# Supplementary material for: Interplay of Antibody and Cytokine Production Reveals CXCL13 as a Potential Novel Biomarker of Lethal SARS-CoV-2 Infection
Source: PubMed Central journal article supplement (PMC7845617; doi:10.1128/msphere.01324-20), 2021-01-20

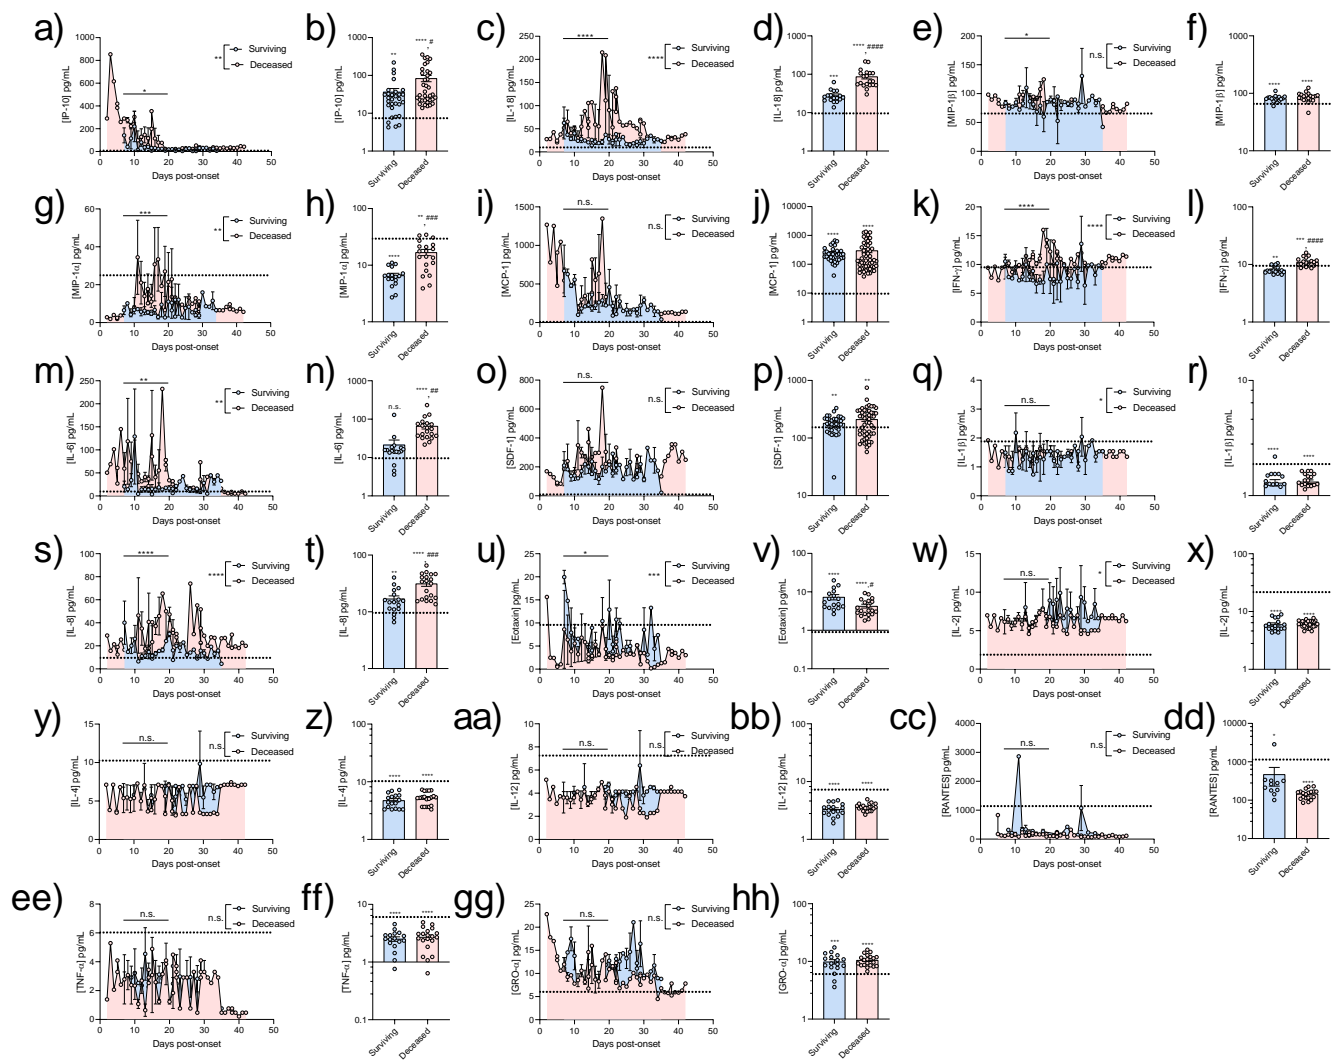

Supplement: mSphere.01324-20-sf003.pdf [file mSphere.01324-20-sf003.pdf]
